# Supplementary material for: Distribution of FIB-4 index in the general population: analysis of 75,666 residents who underwent health checkups
Source: PubMed Central journal article supplement (PMC9101936; doi:10.1186/s12876-022-02290-1), 2022-05-13
Supplement: 12876_2022_2290_MOESM1_ESM.pdf [file 12876_2022_2290_MOESM1_ESM.pdf]

## Male

N=44,420

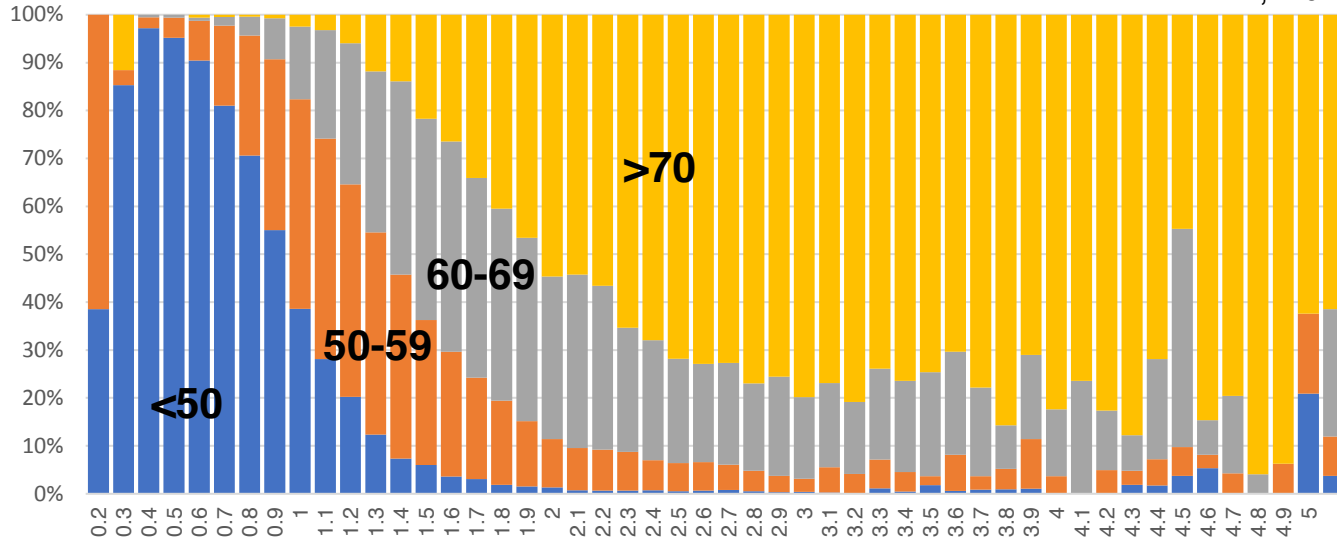

| Age          | N             | FIB-4 index Mean $\pm$ SD       |
|--------------|---------------|---------------------------------|
| <50          | 19,426        | 0.81 $\pm$ 0.32                 |
| 50-59        | 12,165        | 1.23 $\pm$ 0.47                 |
| 60-69        | 9,578         | 1.63 $\pm$ 0.67                 |
| $\geq$ 70    | 3,251         | 2.18 $\pm$ 0.76                 |
| <b>Total</b> | <b>44,420</b> | <b>1.21<math>\pm</math>0.65</b> |

## Female

N=31,246

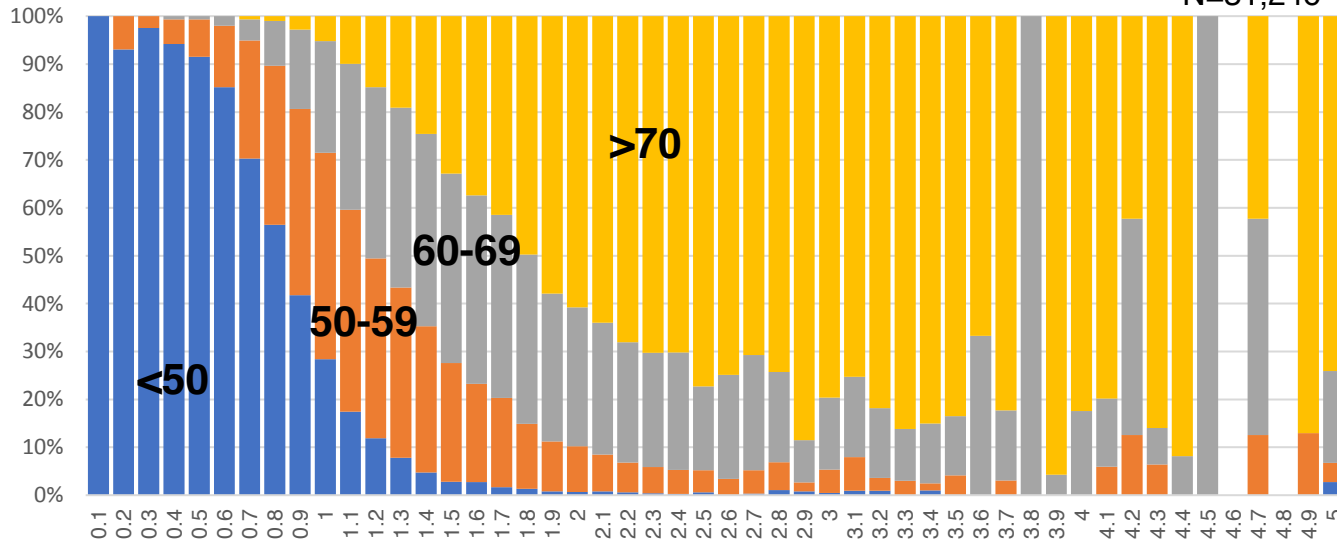

| Age          | N             | FIB-4 index Mean $\pm$ SD       |
|--------------|---------------|---------------------------------|
| <50          | 12,677        | 0.82 $\pm$ 0.29                 |
| 50-59        | 8,703         | 1.23 $\pm$ 0.39                 |
| 60-69        | 7,276         | 1.55 $\pm$ 0.65                 |
| $\geq$ 70    | 2,590         | 2.00 $\pm$ 0.72                 |
| <b>Total</b> | <b>31,246</b> | <b>1.20<math>\pm</math>0.60</b> |

FIB-4 Index

Supplementary Figure 1. Proportion of age group in each FIB-4 Index value in residents who underwent ultrasonography at health checkups by gender
